# Supplementary material
Source: PubMed Central journal article supplement (PMC5685937)
Supplement: NIHMS908671-supplement-Table_S1-S2.pdf [file NIHMS908671-supplement-Table_S1-S2.pdf]

## Supplemental Material

### University of Washington Center for Mendelian Genomics (UW CMG)

Michael J. Bamshad<sup>1,2</sup>, Suzanne M. Leal<sup>3</sup>, and Deborah A. Nickerson<sup>1</sup>  
Peter Anderson<sup>1</sup>, Marcus Annable<sup>1</sup>, Elizabeth Marchani Blue<sup>1</sup>, Kati J. Buckingham<sup>1</sup>, Jennifer Chin<sup>1</sup>, Jessica X Chong<sup>1</sup>, Rodolfo Cornejo Jr.<sup>1</sup>, Colleen P. Davis<sup>1</sup>, Christopher Frazar<sup>1</sup>, Zongxiao He<sup>3</sup>, Gail P. Jarvik<sup>1</sup>, Guillaume Jimenez<sup>1</sup>, Eric Johanson<sup>1</sup>, Tom Kolar<sup>1</sup>, Stephanie A. Krauter<sup>1</sup>, Daniel Luksic<sup>1</sup>, Colby T. Marvin<sup>1</sup>, Sean McGee<sup>1</sup>, Daniel J. McGoldrick<sup>1</sup>, Karynne Patterson<sup>1</sup>, Marcos Perez<sup>1</sup>, Sam W. Phillips<sup>1</sup>, Jessica Pijoan<sup>1</sup>, Peggy D. Robertson<sup>1</sup>, Regie Santos-Cortez<sup>3</sup>, Aditi Shankar<sup>1</sup>, Krystal Slattery<sup>1</sup>, Kathryn M. Shively<sup>1</sup>, Joshua D. Smith<sup>1</sup>, Monica Tackett<sup>1</sup>, Gao Wang<sup>3</sup>, Marc Wegener<sup>1</sup>, Jeffrey M. Weiss<sup>1</sup>, Riana I. Wernick<sup>1</sup>, Marsha M. Wheeler<sup>1</sup>, and Qian Yi<sup>1</sup>

<sup>1</sup>University of Washington

<sup>2</sup> Seattle Children's Hospital

<sup>3</sup>Baylor College of Medicine

**Supplementary Table 1.** Multiple and Two-point LOD score results between NDNC and chromosome 10 markers. Map distances are given in centimorgans (cM) according to the combined linkage-physical map of the human genome.<sup>11</sup>

| Markers  | cM    | Physical position | Multipoint LOD score | Two-point LOD scores at recombination fraction $\theta =$ |       |       |       |       |       |       |
|----------|-------|-------------------|----------------------|-----------------------------------------------------------|-------|-------|-------|-------|-------|-------|
|          |       |                   |                      | 0.00                                                      | 0.01  | 0.05  | 0.10  | 0.20  | 0.30  | 0.40  |
| D10S1772 | 67.79 | 49.50             | -Inf                 | -Inf                                                      | -4.19 | -1.75 | -0.84 | -0.18 | -0.02 | -0.01 |
| D10S1766 | 68.72 | 50.41             | -61.26               | -Inf                                                      | -6.02 | -2.84 | -1.58 | -0.56 | -0.18 | -0.05 |
| D10S1724 | 69.18 | 50.62             | -10.76               | -Inf                                                      | -0.91 | 0.25  | 0.56  | 0.59  | 0.41  | 0.17  |
| D10S567  | 70.37 | 53.58             | 3.99                 | 3.14                                                      | 3.07  | 2.81  | 2.47  | 1.78  | 1.08  | 0.40  |
| D10S539  | 71.91 | 54.73             | 4.03                 | 2.95                                                      | 2.89  | 2.64  | 2.32  | 1.67  | 0.99  | 0.34  |
| D10S1643 | 72.22 | 54.94             | 4.06                 | 3.14                                                      | 3.07  | 2.81  | 2.47  | 1.78  | 1.08  | 0.40  |
| D10S1227 | 74.30 | 57.19             | 4.07                 | 2.95                                                      | 2.89  | 2.64  | 2.32  | 1.67  | 0.99  | 0.34  |
| D10S1756 | 74.60 | 58.76             | 4.08                 | 3.14                                                      | 3.07  | 2.81  | 2.47  | 1.78  | 1.08  | 0.40  |
| D10S549  | 76.28 | 60.49             | 4.08                 | 2.95                                                      | 2.89  | 2.64  | 2.32  | 1.67  | 0.99  | 0.34  |
| D10S207  | 76.28 | 60.74             | 4.09                 | 3.14                                                      | 3.07  | 2.81  | 2.47  | 1.78  | 1.08  | 0.40  |
| D10S609  | 79.73 | 63.43             | 4.09                 | 3.14                                                      | 3.07  | 2.81  | 2.47  | 1.78  | 1.08  | 0.40  |
| D10S581  | 81.25 | 65.51             | 4.07                 | 2.95                                                      | 2.89  | 2.64  | 2.32  | 1.67  | 0.99  | 0.34  |
| D10S1428 | 81.65 | 66.48             | 4.06                 | 2.95                                                      | 2.89  | 2.64  | 2.32  | 1.67  | 0.99  | 0.34  |
| D10S1422 | 83.08 | 67.54             | 4.06                 | 2.95                                                      | 2.89  | 2.64  | 2.32  | 1.67  | 0.99  | 0.34  |
| D10S522  | 84.09 | 68.53             | 4.07                 | 2.95                                                      | 2.89  | 2.64  | 2.32  | 1.67  | 0.99  | 0.34  |
| D10S1670 | 84.09 | 68.54             | 4.09                 | 3.14                                                      | 3.07  | 2.83  | 2.51  | 1.84  | 1.14  | 0.44  |
| D10S210  | 84.28 | 69.71             | 4.09                 | 3.14                                                      | 3.07  | 2.81  | 2.47  | 1.78  | 1.08  | 0.40  |
| D10S1678 | 85.24 | 70.35             | 4.07                 | 2.95                                                      | 2.89  | 2.61  | 2.32  | 1.67  | 0.99  | 0.34  |
| D10S1647 | 85.24 | 70.61             | 4.03                 | 1.44                                                      | 1.42  | 1.29  | 1.14  | 0.83  | 0.51  | 0.19  |
| D10S451  | 87.89 | 71.31             | 4.07                 | 3.14                                                      | 3.07  | 2.81  | 2.47  | 1.78  | 1.08  | 0.40  |
| D10S676  | 88.34 | 71.74             | 4.04                 | 2.95                                                      | 2.89  | 2.64  | 2.32  | 1.67  | 0.99  | 0.34  |
| D10S1650 | 91.81 | 72.96             | -63.82               | -Inf                                                      | -6.87 | -3.47 | -2.10 | -0.89 | -0.34 | -0.08 |
| D10S1432 | 93.93 | 74.32             | -4.63                | 0.77                                                      | -0.32 | 0.09  | 0.18  | 0.09  | 0.01  | -0.08 |

**Supplementary Table 2.** List of homozygous pathogenic variants detected in exome sequence of affected individual (V-1).

| Chromosome | hg19 Position        | Ref. allele | Alt. allele | Gene                   | cDNA change       | Amino acid change | ExAC South Asian MAF |
|------------|----------------------|-------------|-------------|------------------------|-------------------|-------------------|----------------------|
| 1          | 32714174T>G          | T           | G           | <i>FAM167B</i>         | c.464A>C          | p. Ile155Ser      | 0.001                |
| 2          | 179472740G>T         | G           | T           | <i>TTN</i>             | c.47851C>A        | p. Pro15951Thr    | 0.0                  |
| 5          | 13701436G>A          | G           | A           | <i>DNAH5</i>           | c.13448C>T        | p. Thr4483Met     | 0.000099             |
| 8          | 144461524C>T         | C           | T           | <i>RHPN1</i>           | c.791G>A          | p.Pro264Leu       | 0.0014               |
| <b>10</b>  | <b>7028704C&gt;A</b> | <b>C</b>    | <b>A</b>    | <b><i>SLC25A16</i></b> | <b>c.92G&gt;T</b> | <b>p.Arg31Leu</b> | <b>0.00012</b>       |
| 10         | 100008753G>A         | G           | A           | <i>LOXL4</i>           | c.2201-5C>T       | -                 | 0.00017              |
| 15         | 99670560C>G          | C           | G           | <i>SYNM</i>            | c.1995G>C         | p.Asp665Glu       | 0.00055              |
| 15         | 93567640T>G          | T           | G           | <i>CHD2</i>            | c.5192A>C         | p. Phe1731Cys     | 0.0001               |
| 19         | 49622179G>A          | G           | A           | <i>C19orf73</i>        | c.101C>T          | p.Ser34Phe        | 0.00013              |
